# Supplementary material
Source: publisher figshare collection journal article supplement (https://gsajournals.figshare.com/articles/dataset/_/7390391)

Monsalve GC et al (2016) Supplemental Figure 1

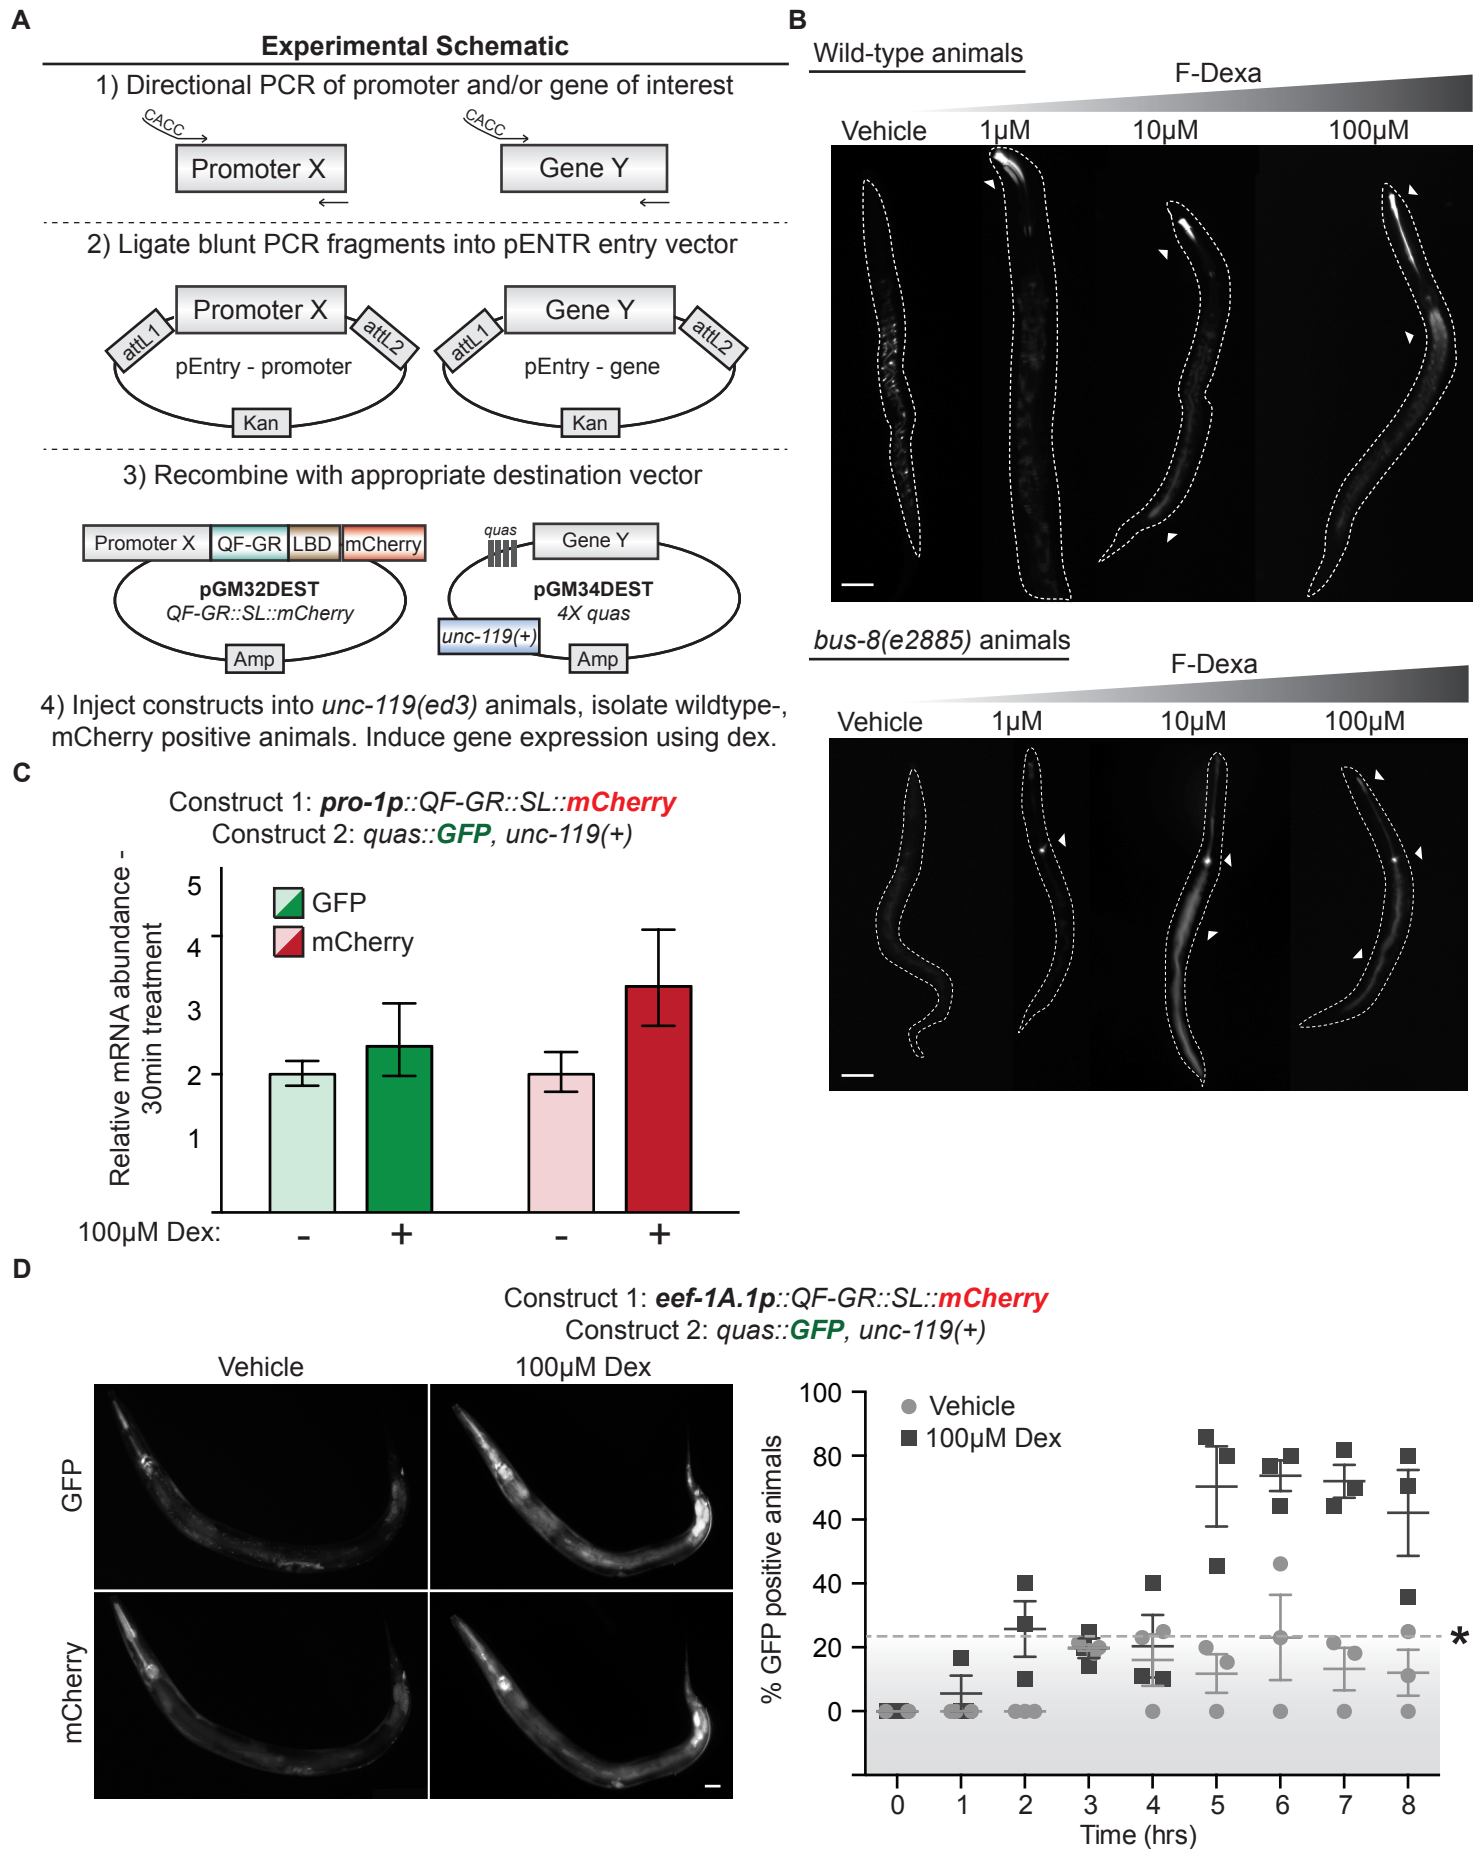

Supplement: Supplementary file 1 [file 2]
